# Supplementary material
Source: Springer Nature journal article supplement (https://www.springermedizin.de/resource/supplementary/12891_2010_1036_MOESM5_ESM.pdf/9507398)
Supplement: MOESM5 [file 9507398]

**Attendees at the CAS(K) 6-year follow-up study screened for impairment measures and exclusion criteria**

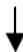

*Potential participant satisfies the criterion for at least one of the impairments?* → **EXCLUDE**

*No*

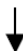

*Yes*

*Potential participant satisfies one or more of exclusion criteria?* → **EXCLUDE**

*Yes*

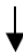

*No*

**Clinic co-ordinator briefly explains what the study entails, provides information leaflet and seeks verbal consent for a research nurse to telephone to discuss the study further**

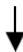

*Potential participant agrees to be contacted by telephone?* → **STOP**

*No*

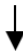

*Yes*

*Research nurse successfully contacts potential participant by telephone?* → **STOP**

*No*

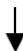

*Yes*

**Research nurse telephones potential participant to discuss the study further**

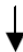

*Potential participant willing and able to commit to daily formal exercises, weekly physiotherapist contact and nurse visits?* → **STOP**

*No*

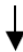

*Yes*

**Research nurse visits potential participant to obtain written informed consent and take baseline impairment and disability measures.**
